# Supplementary material for: Acute skin toxicity associated with a 1-week schedule of whole breast radiotherapy compared with a standard 3-week regimen delivered in the UK FAST-Forward Trial
Source: PubMed Central journal article supplement (PMC4998960; doi:10.1016/j.radonc.2016.02.027), 2016-07
Supplement: mmc1.pdf [file mmc1.pdf]

**SUPPLEMENTARY FILES**

**Appendix 1: Flow diagram of participation in the first and second acute toxicity substudies**

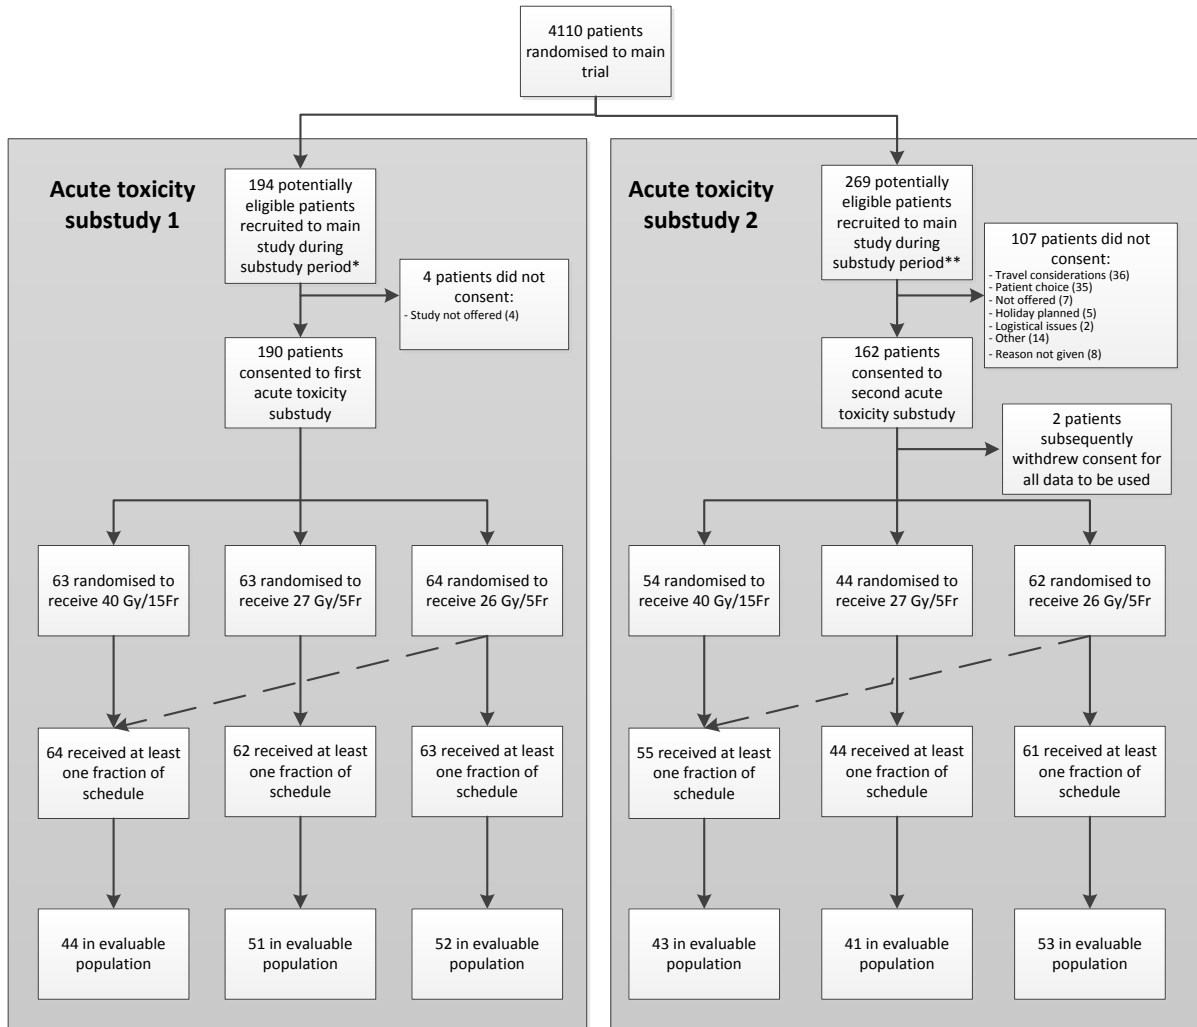

**Appendix 2: Baseline characteristics of patients in first and second acute toxicity substudies**

| Baseline characteristics  | Acute toxicity substudy 1 |               |               | Acute toxicity substudy 2 |               |               |
|---------------------------|---------------------------|---------------|---------------|---------------------------|---------------|---------------|
|                           | 40 Gy/15F                 | 27 Gy/5F      | 26 Gy/5F      | 40Gy/15fr                 | 27Gy/5fr      | 26Gy/5fr      |
|                           | N=63<br>N (%)             | N=63<br>N (%) | N=64<br>N (%) | N=54<br>N (%)             | N=44<br>N (%) | N=62<br>N (%) |
| <b>Age</b>                |                           |               |               |                           |               |               |
| Median (IQR)              | 63 (57 - 69)              | 65 (54 - 68)  | 63 (55 - 68)  | 60 (54-66)                | 61 (56-70)    | 61 (54-64)    |
| Range                     | 46-87                     | 41-82         | 44-86         | 47-81                     | 49-84         | 42-78         |
| <b>Age category</b>       |                           |               |               |                           |               |               |
| <50                       | 5 (8)                     | 11 (17)       | 10 (16)       | 3 (5)                     | 2 (5)         | 6 (10)        |
| ≥50                       | 58 (92)                   | 52 (83)       | 54 (84)       | 52 (95)                   | 42 (95)       | 57 (90)       |
| <b>Tumour grade</b>       |                           |               |               |                           |               |               |
| 1                         | 15 (24)                   | 16 (25)       | 17 (27)       | 14 (25)                   | 10 (23)       | 16 (25)       |
| 2                         | 28 (44)                   | 31 (49)       | 33 (52)       | 27 (49)                   | 23 (52)       | 34 (54)       |
| 3                         | 20 (32)                   | 16 (25)       | 14 (22)       | 14 (25)                   | 11 (25)       | 13 (21)       |
| <b>Risk group</b>         |                           |               |               |                           |               |               |
| Low (≥50 & grade 1 or 2)  | 40 (63)                   | 39 (62)       | 43 (67)       | 38 (69)                   | 31 (70)       | 45 (71)       |
| High (<50 and/or grade 3) | 23 (37)                   | 24 (38)       | 21 (33)       | 17 (31)                   | 13 (30)       | 18 (29)       |
| <b>Boost planned</b>      |                           |               |               |                           |               |               |
| No                        | 54 (86)                   | 52 (83)       | 59 (92)       | 55 (100)                  | 44 (100)      | 63 (100)      |
| Yes                       | 9 (14)                    | 11 (17)       | 5 (8)         | 0                         | 0             | 0             |

**Appendix 3: Modified RTOG and CTCAEv4.03 definitions used in first and second acute skin toxicity sub-studies**

---

**Acute toxicity substudy 1**

---

| <b>*Modified RTOG</b> | <b>Description</b>                           |
|-----------------------|----------------------------------------------|
| Grade 1               | Faint/dull erythema                          |
| Grade 2               | Tender/bright erythema +/- dry desquamation  |
| Grade 3               | Patchy moist desquamation, moderate oedema   |
| Grade 4               | Confluent moist desquamation, pitting oedema |

---

**Acute toxicity substudy 2**

---

| <b>CTCAEv4.03</b> | <b>Description</b>                                                                                                                                 |
|-------------------|----------------------------------------------------------------------------------------------------------------------------------------------------|
| Grade 1           | Faint erythema or dry desquamation                                                                                                                 |
| Grade 2           | Moderate to brisk erythema; patchy moist desquamation, mostly confined to skin fold; moderate oedema                                               |
| Grade 3           | Moist desquamation in areas other than skin folds and creases; bleeding induced by minor trauma or abrasion                                        |
| Grade 4           | Life threatening consequences; skin necrosis or ulceration of full thickness dermis; spontaneous bleeding from involved site; skin graft indicated |

---

\*The inclusion of oedema in the modified RTOG system proved unhelpful in this particular context, since the primary concern was to score moist desquamation; hence the second substudy was undertaken using CTCAE criteria



Appendix 5: Missed assessment form

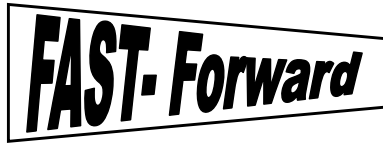

Missed Assessment Form

|                    |                      |                      |                      |                      |                      |                      |                      |                      |                      |
|--------------------|----------------------|----------------------|----------------------|----------------------|----------------------|----------------------|----------------------|----------------------|----------------------|
| RT Centre          | <input type="text"/> | Trial number         | FF                   | <input type="text"/> | <input type="text"/> | <input type="text"/> | <input type="text"/> | <input type="text"/> | <input type="text"/> |
| Referring Hospital | <input type="text"/> |                      |                      |                      |                      |                      |                      |                      |                      |
| Patient's Initials | <input type="text"/> | <input type="text"/> | <input type="text"/> | Date of Birth        | <input type="text"/> | <input type="text"/> | <input type="text"/> | <input type="text"/> | <input type="text"/> |
|                    |                      |                      |                      |                      | Day                  | Month                | Year                 |                      |                      |

**TO BE COMPLETED IF A PATIENT DOES NOT ATTEND FOR A TOXICITY ASSESSMENT**

Was the patient called if they failed to turn up for a toxicity assessment? Yes\*  No\*\*

*\* If yes, please complete the rest of this form*

*\*\* If no, please specify reason*

Date of telephone assessment   
Day Month Year

The patient should be asked the following questions:

Please state reason for not attending for an assessment

Has there been any change in skin colour since last week?

Yes, less pink/red  Yes, more pink/red  No, same colour

Is there been any evidence of skin weeping or oozing?

Yes\*  No

*\* If yes, please specify the site*

Skin creases/folds  Other

|            |                      |                     |                      |                      |                      |                      |                      |                      |                      |
|------------|----------------------|---------------------|----------------------|----------------------|----------------------|----------------------|----------------------|----------------------|----------------------|
| Signature  | <input type="text"/> | Date form completed | <input type="text"/> | <input type="text"/> | <input type="text"/> | <input type="text"/> | <input type="text"/> | <input type="text"/> | <input type="text"/> |
| Print Name | <input type="text"/> |                     |                      |                      |                      |                      |                      |                      |                      |
|            |                      |                     |                      |                      | Day                  | Month                | Year                 |                      |                      |

|                                |          |          |
|--------------------------------|----------|----------|
| Received                       | Entered  | Checked  |
| TRAQS <input type="checkbox"/> |          |          |
| Initials                       | Initials | Initials |
